# Supplementary material
Source: PubMed Central journal article supplement (PMC3938263)

## **Supplemental Data**

### **ALS Mutation FUS-R521C Causes DNA Damage and RNA Splicing Defects**

Haiyan Qiu, Sebum Lee, Yulei Shang, Wen-Yuan Wang, Kin Fai Au, Sherry Kamiya, Sami J. Barmada, Hansen Lui, Steven Finkbeiner, Caitlin E. Carlton, Amy A. Tang, Michael C. Oldham, Hejia Wang, James Shorter, Anthony J. Filiano, Erik D. Roberson, Warren G. Tourtellotte, Bin Chen, Li-Huei Tsai, Eric J. Huang

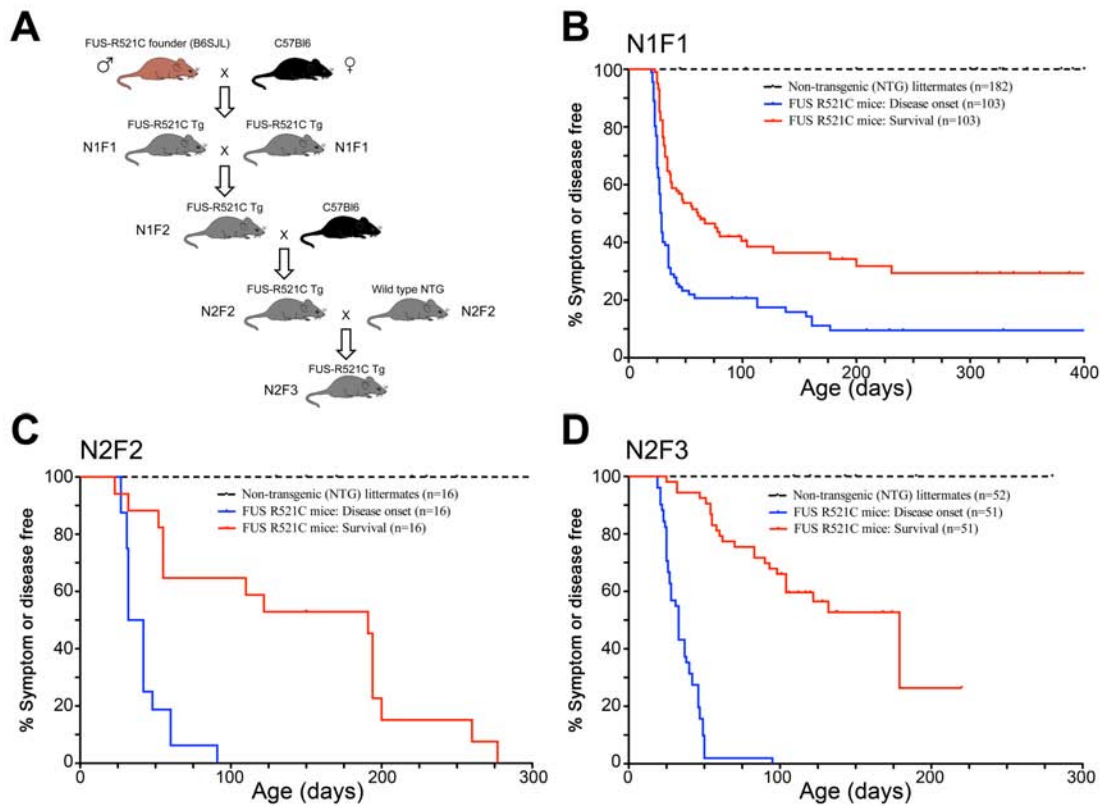

**Supplemental Figure 1. Strategy to Propagate FUS-R521C Transgenic Mice and the Kaplan-Meier Curves for Disease Onset and Survival in N1F1, N2F2 and N2F3 FUS-R521C Mice.**

(A) A schematic diagram showing the strategy to expand and propagate FUS-R521C transgenic mice from founders to N1F1, N2F2 and N2F3 generations. In brief, the FUS-R521C founder was mated with C57BL6 females to generate N1F1 mice. The surviving N1F1 mice (3-6 months old) are intercrossed to generate N1F2 mice, which were mated with C57BL6 to generate N2F2 mice. To maintain the FUS-R521C colony, N2F2 mice were intercrossed for N2F3 mice. (B) Kaplan-Meier survival curve for the disease onset and survival in N1F1 FUS-R521C mice (n=103) and non-transgenic littermate controls (n=182). (C-D) The disease onset and survival curves for N2F2 and N2F3 FUS-R521C mice were similar, supporting the successful propagation of the transgene and the reproducibility of FUS-R521C phenotype.

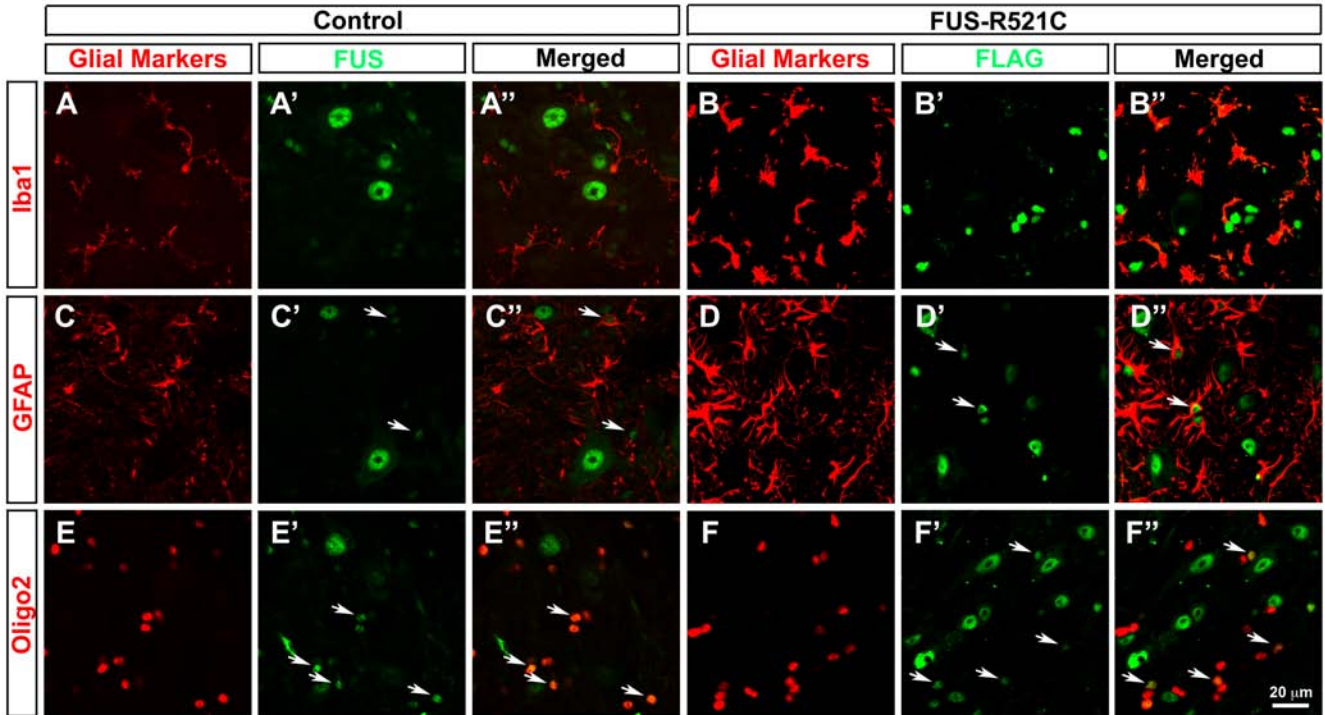

**Supplemental Figure 2. Expression of the Endogenous FUS Proteins and FLAG-tagged FUS-R521C Transgenic Proteins in Glial Cells Within Spinal Cord.**

(A-B'') Confocal microscopy shows no expression of FUS in Iba-1+ microglial in control spinal cord from wild type mice. Despite the presence of robust microgliosis, there is no detectable FLAG-tagged FUS-R521C transgenic protein in microglia of the spinal cord in FUS-R521C mice. (C-D'') Several GFAP-positive astrocytes (arrows) in control spinal cord express FUS proteins at levels lower than that in adjacent spinal motor neurons. Similarly, FLAG-tagged FUS-R521C proteins can be detected in several GFAP-positive astrocytes in the spinal cord of FUS-R521C mice (arrows). (E-F'') Similar to the results in astrocytes, both endogenous FUS and FLAG-tagged FUS-R521C proteins can be detected in Olig2-positive oligodendroglia in the spinal cord of control and FUS-R521C mice (arrows). Scale bar in panel F'' is 20  $\mu$ m, and the same scale applies to all panels. Unlike the rabbit FUS polyclonal antibodies used in Figures 1 & 3, mouse monoclonal antibody for FUS cannot detect FUS in synapses or dendrites.

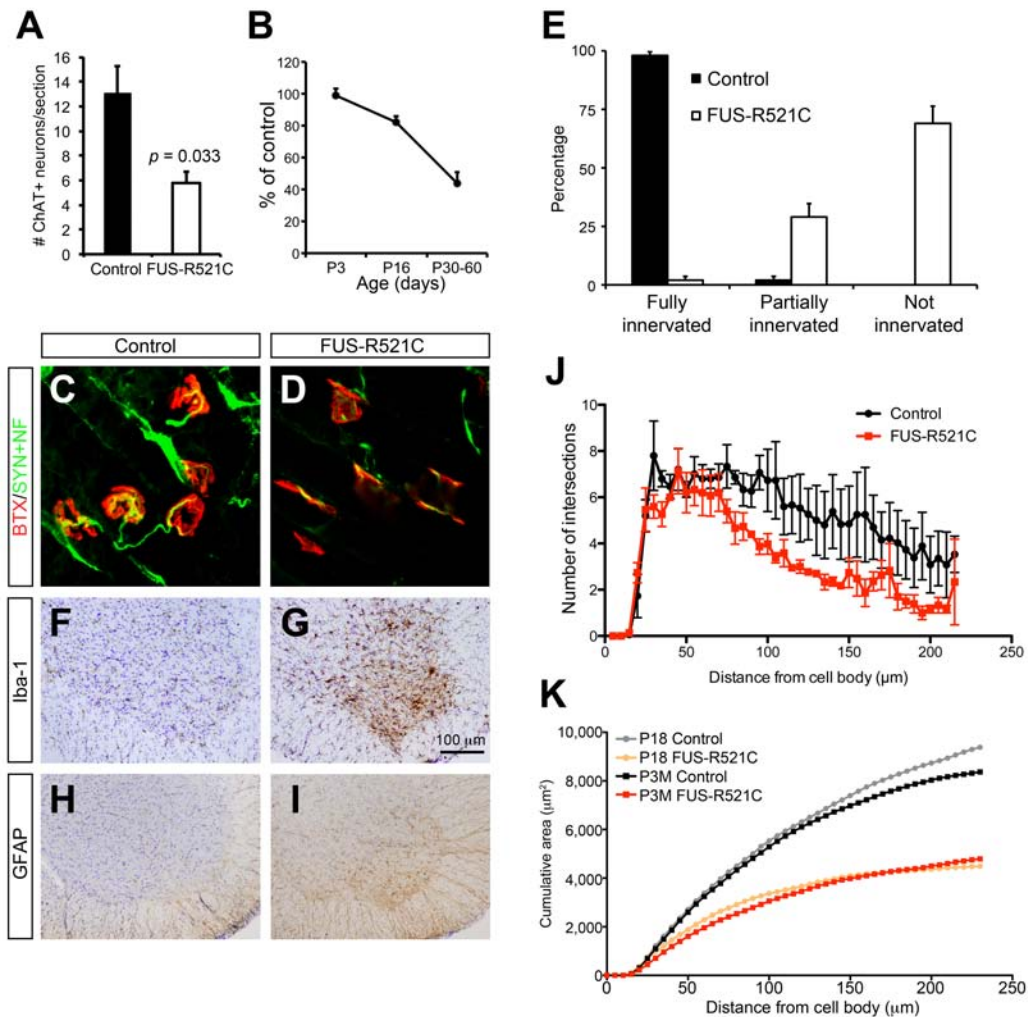

### Supplemental Figure 3. Progressive Loss of Spinal Motor neurons and Deficits in the Innervation at the Neuromuscular Junction in FUS-R521C Transgenic Mice.

(A-B) Quantification of choline acetyltransferase (ChAT)-positive motor neurons in the cervical spinal cord of control and FUS-R521C transgenic mice at postnatal day (P) 3, P16 and P30-60 shows a progressive loss of motor neurons in FUS-R521C mice. By end stage (P30-60), there is ~55% loss of motor neurons in FUS-R521C mice. (C-E) FUS-R521C mice show defects in the innervation at the neuromuscular junction (NMJ). In contrast to the NMJ in non-transgenic controls, the majority of the NMJ in FUS-R521C mice are either not innervated or partially innervated (panel i). (F-I) Similar to the results in Supplemental Figure 3, the anterior horn of the spinal cord in FUS-R521C mice show a marked increase in microgliosis, highlighted by Iba1+ cells, and a very modest astrogliosis, shown by GFAP IHC. (J-K) Sholl analyses of dendritic branches and cumulative area of dendrites show that similar dendritic arborization defects in FUS-R521C spinal motor neurons can be detected in P18 mice.

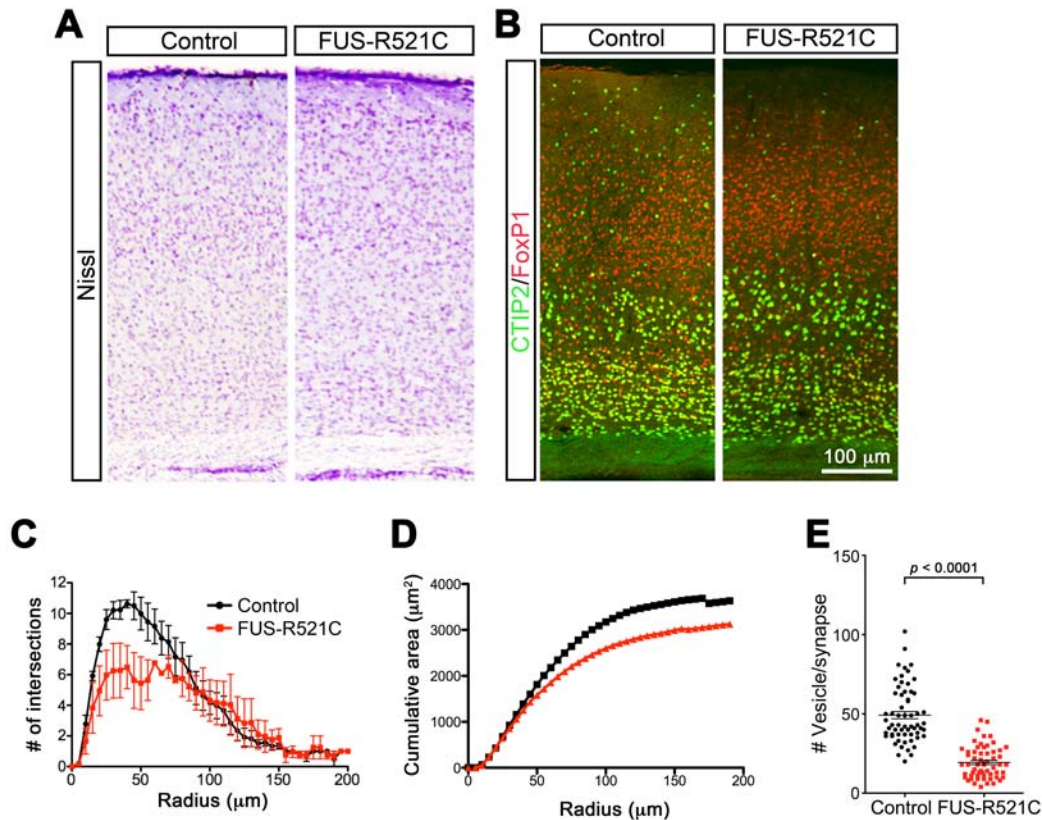

**Supplemental Figure 4. Phenotype in the Basal Dendrites and Synapses in Layers IV and V of the Sensorimotor Cortex in FUS-R521C Mice.**

(A-B) Nissl stains and layer-specific markers, CTIP2 and FoxP1, show no detectable differences in the general organization of the sensorimotor cortex in FUS-R521C transgenic mice. (C-D) Similar to the apical dendrites, the basal dendrites in layers IV and V of the sensorimotor cortex in FUS-R521C mice also show reduced branch points and reduced cumulative surface areas ( $p < 0.0001$ , 2-way repeated measures ANOVA). (E) Quantification of the number of synaptic vesicles per bouton shows significant reduction in the sensorimotor cortex of FUS-R521C mice ( $p < 0.0001$ , 2-tailed Student's *t* test, 54 high magnification [12,500x] fields from 3 control mice and 58 from 3 FUS-R521C mice).

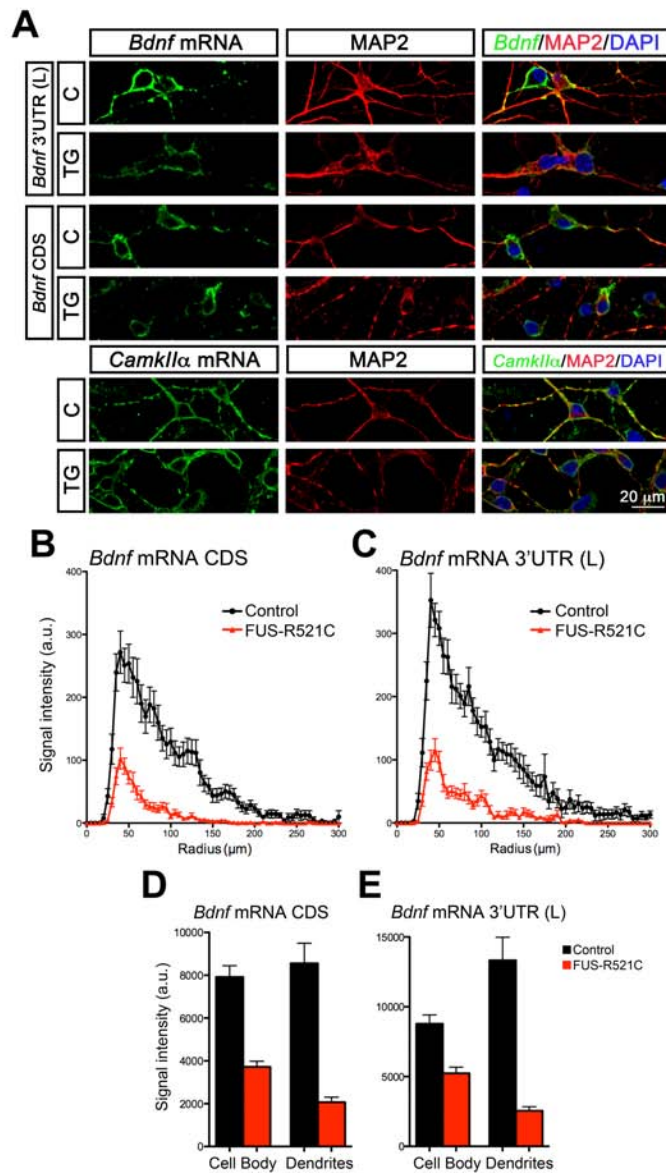

**Supplemental Figure 5. Reduced *Bdnf* mRNA Expression in the Cell Body and Dendrites of Cultured Cortical Neurons from FUS-R521C mice.**

(A) Cortical neurons cultured from E17.5 FUS-R521C embryos show reduced *Bdnf* mRNA in cell body and distal dendrites, whereas the expression and dendritic targeting of *CamkIIα* mRNA remains unchanged. (B-C) NeuroLucida tracing and quantification of *Bdnf* mRNA fluorescent signal intensity, detected by *in situ* hybridization using either the probe that detects *Bdnf* coding sequence (CDS)(panel B) or 3' UTR long (L) sequence (panel C), shows consistent reduction of *Bdnf* mRNA in the cell body and along dendrites of cortical neurons from FUS-R521C transgenic mice. (D-E) Quantification shows significantly reduced total *Bdnf* mRNA signal in the cell body and dendrites of FUS-R521C-expressing neurons.

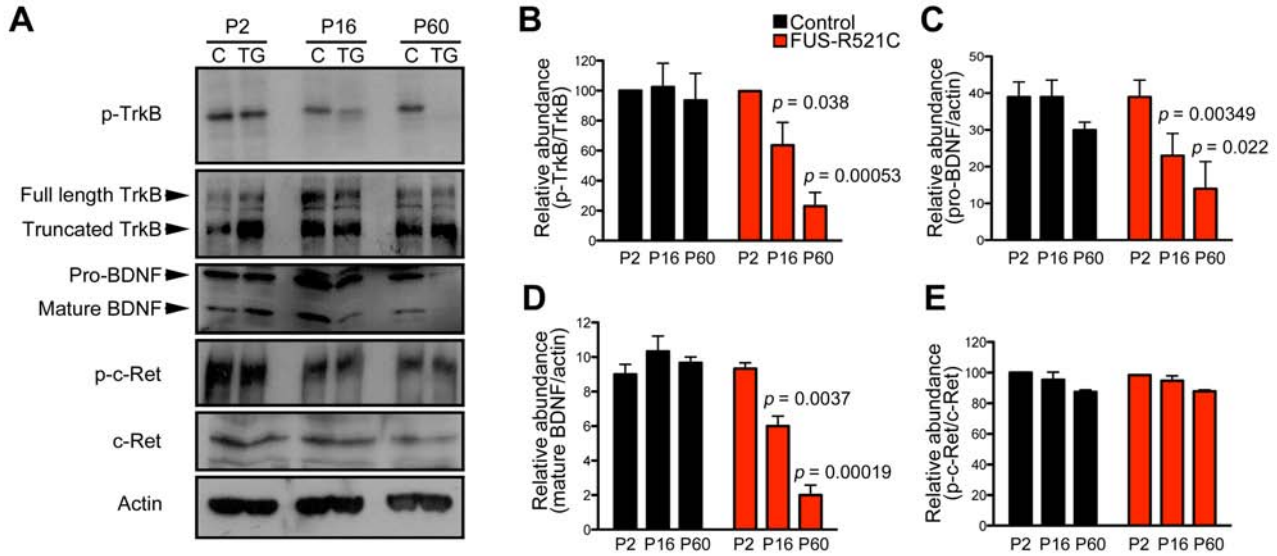

**Supplemental Figure 6. Progressive Reduction in TrkB Activation and BDNF Protein Levels in the Spinal Cord of FUS-R521C Mice Without Affecting the Activation of GDNF Receptor c-Ret.**

(A) Protein lysates are prepared from the spinal cord of control (C) and FUS-R521C (TG) mice at postnatal day 2 (P2), day 16 (P16) and day 60 (P60) to detect the relative abundance of activated TrkB receptor (detected using a phosphor-specific TrkB antibody), full length and truncated TrkB, pro-BDNF, mature BDNF, activated GDNF receptor c-Ret (p-c-Ret) and total c-Ret using Western blot analyses. The experiments are repeated using tissues from three control and FUS-R521C mice, and results are quantified using NIH ImageJ. (B-E) The relative abundance of activated TrkB receptor (p-TrkB), pro-BDNF and mature BDNF shows no detectable difference between control and FUS-R521C mice at P2, but a progressive reduction from P16 to P60 (panels C to D). In contrast, the level of activated c-Ret receptor shows no difference in the spinal cord of control and FUS-R521C mice (panel E). Statistics, Student's *t* test, *n* = 3 for each condition.

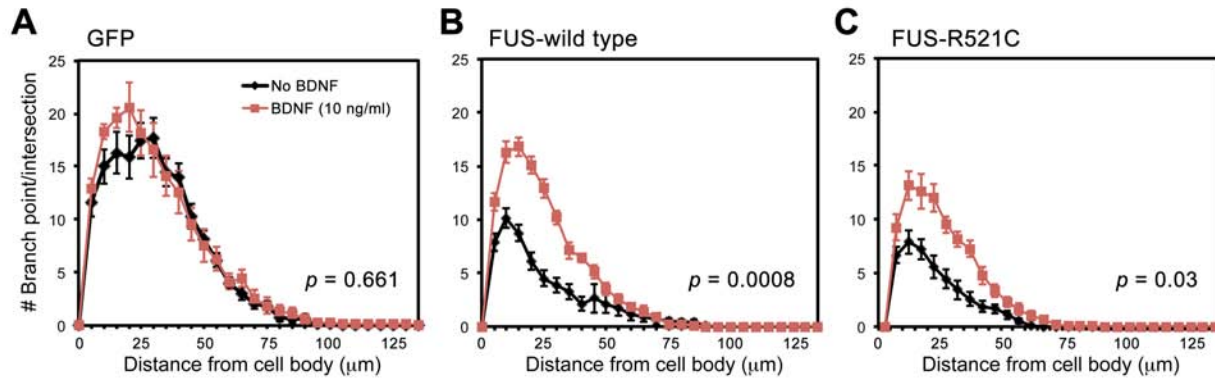

**Supplemental Figure 7. Exogenous BDNF Partially Ameliorates the Dendritic Arborization Phenotype of Cortical Neurons expressing Wild Type FUS or FUS-R521C.**

(A-C) Cortical neurons prepared from the cortices of E15.5 wild type embryos are transfected with plasmids expressing GFP, wild type FUS or FUS-R521C on day 7 after plating (7 DIV). The transfected neurons are then cultured for 7 days (7 DIV) in the absence or presence of recombinant BDNF (10ng/ml) before they are collected for immunostaining for TuJ1 antibody to highlight dendrite morphology. The dendrite morphology in transfected neurons is captured using Neurolucida tracings and the complexity of dendritic arborization is quantified using Sholl analyses. Significant dendritic growth retardation is also noted in neurons expressing wild type FUS (B) or FUS-R521C (C). Exogenous BDNF (10 ng/ml) partially ameliorates the dendritic growth phenotype in neurons expressing wild type FUS or FUS-R521C. At least 30 neurons are captured and quantified. Statistics uses 2-way repeated measures ANOVA.



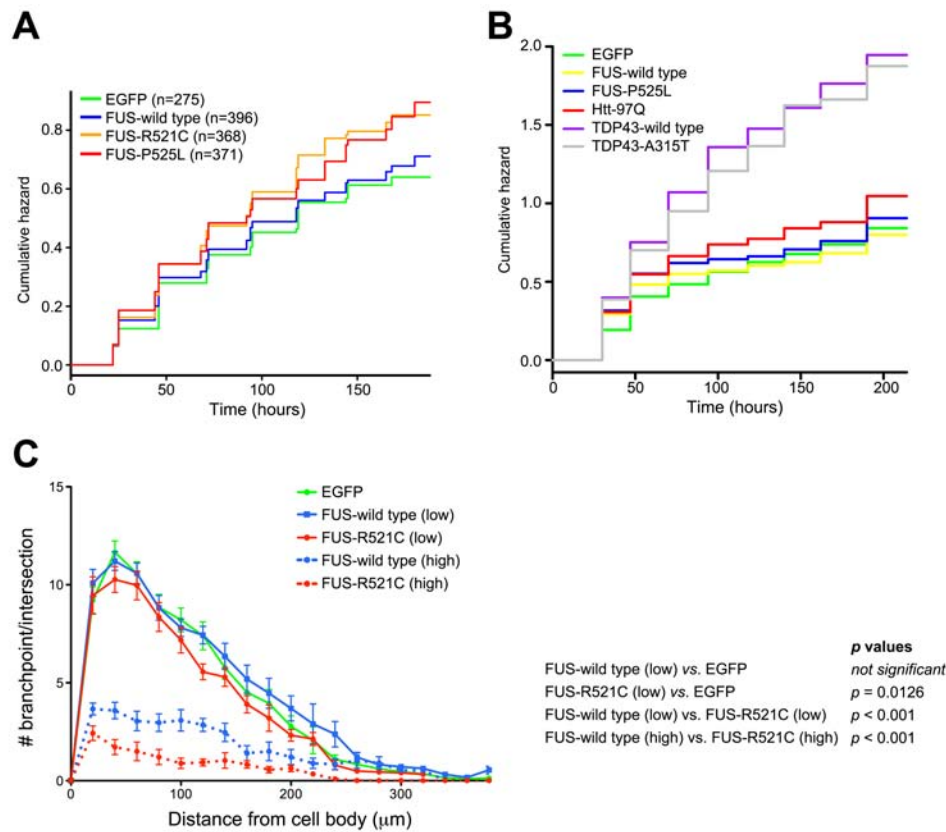

**Supplemental Figure 8. Expression of Wild Type FUS or FALS-associated Mutation FUS-R521C or FUS-P525L in Cortical Neurons Leads to Modest Cell Death and Dose-Dependent Dendritic Defects.**

(A) E15.5 wild type cortical neurons are transfected at 7 DIV with plasmids that expressed GFP, GFP-FUS wild type, GFP-FUS-R521C or GFP-P525L. Images of the transfected neurons are captured using automated microscopy to monitor the survival of hundreds of neurons over the course of 10 days. Using the previously established criteria for neuronal death, we showed that the cumulative hazard curves of neurons expressing wild type FUS showed no significant increase in the relative risk of cell death (HR: 1.08,  $p = 0.624$ ). In contrast, the relative risk of cell death was higher in neurons expressing FUS-R521C or FUS-P525L (HR: 1.40,  $p = 0.039$  for FUS-R521C and HR: 1.38,  $p = 0.049$  for FUS-P525L). (B) The effects of FUS-R521C and FUS-P525L on neuronal survival appeared to dosage-dependent as lower FUS cDNA concentrations had less prominent toxicity to neurons. Intriguingly, however, compared to the same DNA concentrations of mutant huntingtin-97Q (Htt-97Q), wild type TDP43 or TDP43- A315T, expression of wild type or mutant FUS proteins led to lower cytotoxicity in cultured neurons. (C) Sholl analyses show dose-dependent reduction of dendritic arborization caused by wild type FUS and FUS-R521C. Side-by-side comparisons show that FUS-R521C mutant proteins consistently cause more severe dendritic defects in cortical neurons.

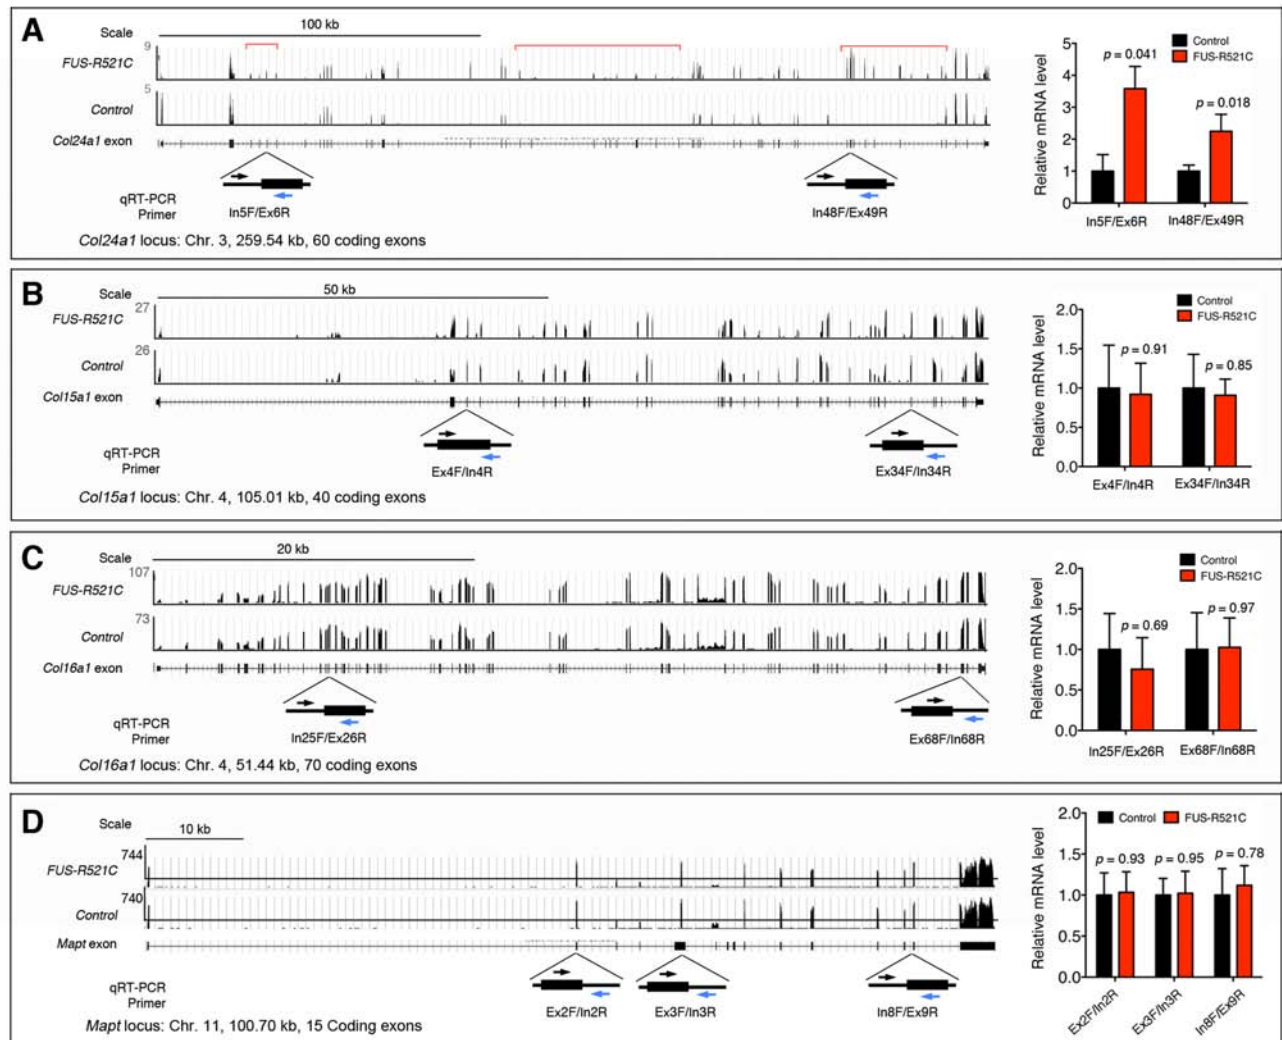

**Supplemental Figure 9. RNA splicing defects in *Col24a1* gene, but not in *Col15a1*, *Col16a1* or *Mapt (tau)* genes.**

(A) The mouse *Col24a1* gene is located on mouse chromosome 3 and encompasses ~259Kb with 60 exons. In FUS-R521C spinal cord, *Col24a1* mRNA shows evidence of excessive inclusion of cassette exons (highlighted by the bracketed regions). (B-D) In contrast, *Col15a1* (chromosome 4, 40 exons), *Col16a1* (chromosome 4, 70 exons) and *Mapt* (aka *tau*, chromosome 11, 15 exons) show no evidence of increase in exon inclusion or intron retention. RNA-seq data are further confirmed by qRT-PCR using primers that detect the presence of 5' and 3' splice junctions in *Col24a1*, *Col15a1*, *Col16a1* and *Mapt*. Quantifications of the qRT-PCR data are shown in each panel. Statistics uses Student's *t* test, *n* = 3.

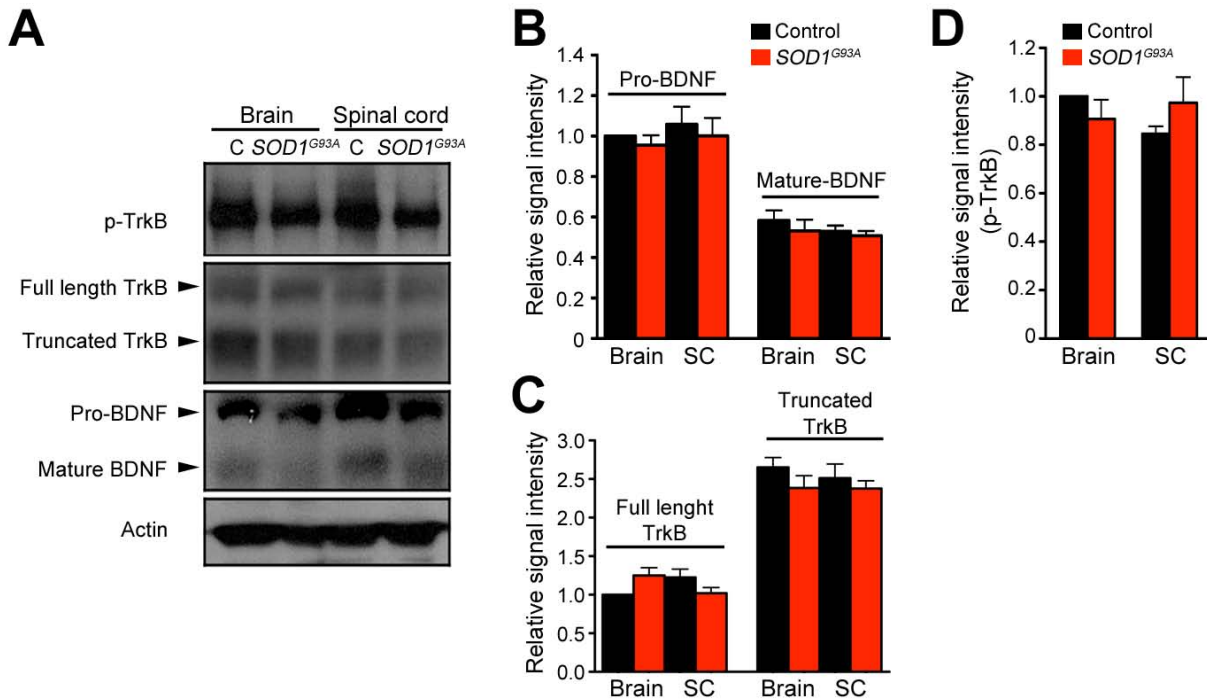

**Supplementary Figure 10. No Detectable Reduction of BDNF Protein or TrkB Activation in the Spinal Cord Tissues of *SOD1<sup>G93A</sup>* Mice.**

(A) Western blot analyses show no detectable difference in the level of activated TrkB receptor (detected using a phosphor-specific TrkB antibody), full length and truncated TrkB, pro-BDNF and mature BDNF in protein lysates from the spinal cord of control (C) and *SOD1<sup>G93A</sup>* mice at end-stage. The experiments are repeated using tissues from three control and FUS-R521C mice, and results are quantified using NIH ImageJ. (B-D) Quantification of the Western blot results shows no difference in the relative abundance of activated TrkB receptor (p-TrkB), full-length TrkB, truncated TrkB, pro-BDNF and mature BDNF between control and *SOD1<sup>G93A</sup>* mice at end-stage,

**Supplemental Table 1. DAVID Bioinformatics Gene Ontology (GO) Analyses of RNA-seq results from FUS-R521C spinal cord. (Related to Figure 8)**

| <b>Genes With Increased Reads</b>                                          |                                                                                                |                                                                                                    |                                                                                                                                                                                                                     |
|----------------------------------------------------------------------------|------------------------------------------------------------------------------------------------|----------------------------------------------------------------------------------------------------|---------------------------------------------------------------------------------------------------------------------------------------------------------------------------------------------------------------------|
| <b>Functional annotation</b>                                               | <b>GO groups</b>                                                                               | <b>Adjusted p value</b>                                                                            | <b>Gene list</b>                                                                                                                                                                                                    |
| <b>Extracellular matrix</b><br>(Enrichment score 9.42)                     | GO:0005578<br>GO:0005581<br>GO:0005201<br>GO:0031012                                           | 2.01E-10<br>4.76E-10                                                                               | <i>ADAMTS10, ADAMTS16, ANGPTL4, ANXA2, COL5A2, COL5A3, COL7A1, COL11A1, COL16A1, COL24A1, COL27A1, COL28A1, DCN, EMID2, ENTPD2, LAMA5, LGALS3, LOX, MATN2, MMP12, MMP19, OGN, POSTN, TGFB1, TIMP1, WNT10B, VWA1</i> |
| <b>Lymphocyte mediated immunity</b><br>(Enrichment score 7.13)             | GO:0002449<br>GO:0019724<br>GO:0002250<br>GO:0002460<br>GO:0002443<br>GO:0016064<br>GO:0002252 | 1.44E-08<br>2.76E-08<br>4.61E-08<br>4.61E-08<br>8.92E-08<br>2.25E-07<br>6.27E-07                   | <i>BCL3, C1QA, C1QB, C1QC, C3, C4B, FCER1G, FCGR2B, FCGR3, ICAM1, ICOSL, IRF7, PTX3</i>                                                                                                                             |
| <b>Enzyme inhibitor activity</b><br>(Enrichment score 3.88)                | GO:0004857<br>GO:0004866<br>GO:0030414                                                         | 3.73E-05<br>1.70E-04<br>3.67E-04                                                                   | <i>A2M, AGT, ANGPTL4, ANXA2, ANXA3, C3, C4B, CD109, CDKN1A, COL7A1, COL28A1, CST7, SERPINA3N, SPINT1, SPINT2, TIMP1</i>                                                                                             |
| <b>Collagen</b><br>(Enrichment score 3.82)                                 | GO:0005581<br>GO:0005201                                                                       | 2.73E-05<br>0.001996204                                                                            | <i>COL5A2, COL5A3, COL11A1, COL24A1, COL27A1, LOX</i>                                                                                                                                                               |
| <b>Chemotaxis</b><br>(Enrichment score 3.38)                               | GO:0042330<br>GO:0006935<br>GO:0007626                                                         | 1.97E-04<br>1.97E-04<br>0.00522163                                                                 | <i>C3AR1, CCL2, CCL3, CCL6, CCL11, CMTM3, CXCL10, FCER1G, FCGR3, HOXD9, HOXD10, IL16</i>                                                                                                                            |
| <b>Proximal/distal pattern formation</b><br>(Enrichment score 2.96)        | GO:0009954<br>GO:0035113<br>GO:0030326<br>GO:0035107<br>GO:0035108<br>GO:0060173<br>GO:0048736 | 2.58E-07<br>0.002210077<br>0.002210077<br>0.005691661<br>0.005691661<br>0.006837974<br>0.006837974 | <i>HOXA9, HOXA10, HOXA11, HOXC10, HOXC11, HOXD9, HOXD10, HOXD11</i>                                                                                                                                                 |
| <b>Positive regulation of phagocytosis</b><br>(Enrichment score 2.73)      | GO:0050766<br>GO:0050764<br>GO:0045807<br>GO:0030100<br>GO:0051050<br>GO:0060627               | 5.50E-05<br>8.42E-05<br>3.85E-04<br>0.002739265<br>0.011758098<br>0.01926849                       | <i>C3, CARTPT, CLEC7A, FCER1G, FCGR2B, FCGR3, PTX3, TRIP6</i>                                                                                                                                                       |
| <b>Anterior/posterior pattern formation</b><br>(Enrichment score 2.47)     | GO:0009952<br>GO:0003002<br>GO:0007389                                                         | 1.36E-04<br>6.80E-04<br>0.002601203                                                                | <i>EGR2, HOXA9, HOXA10, HOXA11, HOXC9, HOXC10, HOXC11, HOXC13, HOXD9, HOXD10, HOXD11, OTX2, PCGF2, SOSTDC1</i>                                                                                                      |
| <b>Complement activation, classical pathway</b><br>(Enrichment score 2.15) | GO:0002455<br>GO:0006958<br>GO:0006959<br>GO:0006956<br>GO:0002541<br>GO:0051605               | 4.42E-04<br>0.002197529<br>0.003234547<br>0.004329258<br>0.004329258<br>0.032815789                | <i>BCL3, C1QA, C1QB, C1QC, C3, C4B, CLEC7A</i>                                                                                                                                                                      |
| <b>Chemokine activity</b><br>(Enrichment score 1.98)                       | GO:0008009<br>GO:0042379                                                                       | 0.004801982<br>0.005275903                                                                         | <i>CCL2, CCL3, CCL6, CCL11, CXCL10</i>                                                                                                                                                                              |
| <b>Genes With Decreased Reads</b>                                          |                                                                                                |                                                                                                    |                                                                                                                                                                                                                     |
| <b>Functional annotation</b>                                               | <b>GO groups</b>                                                                               | <b>Adjusted p value</b>                                                                            | <b>Gene list</b>                                                                                                                                                                                                    |
| <b>Synapse</b><br>(Enrichment score 8.99)                                  | GO:0044456<br>GO:0045202                                                                       | 5.27E-10<br>1.62E-09                                                                               | <i>ANKS1B, ARC, BSN, CHRM1, CHRM2, DLGAP2, GLRA1, GRID2, GRIN3A, GRIN2B, LZTS1, NRG1, PCLO, PSD3, RIMS1, SHANK2, SLC17A7, SV2C, SYT2</i>                                                                            |
| <b>Gated channel activity</b><br>(Enrichment score 7.90)                   | GO:0022836<br>GO:0015267<br>GO:0022803                                                         | 2.37E-09<br>3.97E-09<br>3.97E-09                                                                   | <i>CACNA1E, CACNG2, CLCN5, GRID2, GRIN2A, GRIN2B, GRIN3A, GRIN3B, HCN2, KCNA2, KCNB2, KCNC3, KCNH3, KCNH7, KCNJ4, KCNJ6, KCNJ14, KCNK9,</i>                                                                         |

|                                                                            |                                                                                                                                                                      |                                                                                                                                                |                                                                                                                                                                            |
|----------------------------------------------------------------------------|----------------------------------------------------------------------------------------------------------------------------------------------------------------------|------------------------------------------------------------------------------------------------------------------------------------------------|----------------------------------------------------------------------------------------------------------------------------------------------------------------------------|
|                                                                            | GO:0046873<br>GO:0005261<br>GO:0005216<br>GO:0022838<br>GO:0030001<br>GO:0006812                                                                                     | 4.38E-09<br>6.67E-09<br>7.22E-09<br>1.36E-08<br>2.74E-07<br>4.80E-06                                                                           | <i>KCNMA1, RYR2</i>                                                                                                                                                        |
| <b>Integral to membrane</b><br>(Enrichment score 7.81)                     | GO:0016021<br>GO:0031224                                                                                                                                             | 2.56E-05<br>7.14E-05                                                                                                                           | <i>ANKS1B, BMPR2, CALN1, CHRM2, DCC, DHCR24, DNAJB14, ERBB4, HHIP, HTR2A, KCNG4, LDLR, MGAT5, PTK2B, RASL10A, SLC26A2, SPINK10, SUSSD2, UGT8A, VIPR2 (total 140 genes)</i> |
| <b>Voltage-gated cation channel activity</b><br>(Enrichment score 7.04)    | GO:0022843<br>GO:0005244<br>GO:0022832                                                                                                                               | 1.02E-07<br>2.12E-07<br>2.12E-07                                                                                                               | <i>CACNG2, CLCN5, HCN2, KCNMA1, KCNA2, KCNB2, KCNC3, KCNH1, KCNG4, KCNH3, KCNH7, KCNJ4, KCNJ6, KCNJ14, KCNK9, SCN8A</i>                                                    |
| <b>Voltage-gated potassium channel activity</b><br>(Enrichment score 6.55) | GO:0030955<br>GO:0031420<br>GO:0005267<br>GO:0006813<br>GO:0005249                                                                                                   | 2.71E-07<br>2.79E-07<br>7.67E-07<br>1.98E-06<br>2.10E-06                                                                                       | <i>HCN2, KCNA2, KCNB2, KCNC3, KCNG1, KCNG4, KCNH3, KCNH7, KCNJ4, KCNJ6, KCNJ14, KCNK9, KCNMA1, SLC5A7, SCN8A, SLC9A7, SLC10A4, SLC17A7</i>                                 |
| <b>Synaptic transmission</b><br>(Enrichment score 6.06)                    | GO:0007268<br>GO:0019226<br>GO:0007267                                                                                                                               | 2.52E-07<br>2.76E-07<br>9.78E-06                                                                                                               | <i>ATXN1, CACNG2, CHAT, CHRM1, EGR3, GLRA1, GRID2, GRIN2A, GRIN2B, GRM3, KCNMA1, NCAN, PCLO, SHC3, SLC17A7, SLC5A7, STX1B, SV2C, UGT8A</i>                                 |
| <b>Sterol biosynthetic process</b><br>(Enrichment score 5.80)              | GO:0016126<br>GO:0016125<br>GO:0006694<br>GO:0008203<br>GO:0008202                                                                                                   | 5.82E-08<br>1.71E-06<br>6.99E-06<br>4.90E-05<br>2.37E-04                                                                                       | <i>CYP51, DHCR7, DHCR24, HMGCR, HMGCS1, HSD17B7, LDLR, LSS, MVD, SC4MOL, SC5D, SORL1</i>                                                                                   |
| <b>Ion binding</b><br>(Enrichment score 4.76)                              | GO:0043167<br>GO:0046872<br>GO:0043169                                                                                                                               | 1.36E-05<br>1.61E-05<br>2.44E-05                                                                                                               | <i>AOX4, ATP2A1, BMPR2, BSN, CALN1, CBL, CIT, FASN, GUCY1A2, KCNG1, KCNG4, KCNJ4, LDLR, MFAP4, NOS1, NR2E1, PCLO, RYR2, TESC, TRIM2, TRIM16 (total 105 genes)</i>          |
| <b>Neuron projection development</b><br>(Enrichment score 4.60)            | GO:0031175<br>GO:0048812<br>GO:0030030<br>GO:0048666<br>GO:0007409<br>GO:0030182<br>GO:0048858<br>GO:0048667<br>GO:0000904<br>GO:0032990<br>GO:0000902<br>GO:0032989 | 1.61E-07<br>6.09E-06<br>9.95E-06<br>1.07E-05<br>1.27E-05<br>2.22E-05<br>2.90E-05<br>4.11E-05<br>4.97E-05<br>4.97E-05<br>7.71E-04<br>0.00102235 | <i>APC, CHAT, CIT, DCC, DST, EPHB1, FEZF2, FOXP1, GAS7, GRIN3A, LHX2, MNX1, MTAP1B, NEFL, NKX2-9, NR2E1, RTN4RL2, SEMA5A, TBR1</i>                                         |
| <b>Ionotropic glutamate receptor activity</b><br>(Enrichment score 3.35)   | GO:0005234<br>GO:0004970<br>GO:0008066<br>GO:0005230                                                                                                                 | 2.86E-04<br>2.86E-04<br>6.36E-04<br>0.00745521                                                                                                 | <i>GRIN2A, GRIN3A, GRIN2B, GRIN3B, GRID2</i>                                                                                                                               |

| <b>Supplemental Table 2A. Primers for FPG assays. (Related to Figure 5)</b>                                                                                             |                           |                            |
|-------------------------------------------------------------------------------------------------------------------------------------------------------------------------|---------------------------|----------------------------|
| <b>Primers for promoter regions.</b>                                                                                                                                    |                           |                            |
| <b>Genes</b>                                                                                                                                                            | <b>Forward (5' to 3')</b> | <b>Reverse (5' to 3')</b>  |
| <i>b-actin</i>                                                                                                                                                          | CCCATCGCCAAAACCTCTTCA     | GGCCACTCGAGCCATAAAAG       |
| <i>b-globin</i>                                                                                                                                                         | TGACCAATAGTCTCGGAGTCCTG   | AGGCTGAAGGCCTGTCCTTT       |
| <i>b-tubulin</i>                                                                                                                                                        | TCCAGGGATGAAGAATGAGG      | TGAGCACTGGTAGGGAGCTT       |
| <i>Arc</i>                                                                                                                                                              | CAGCATAAATAGCCGCTGGT      | GAGTGTGGCAGGCTCGTC         |
| <i>Bdnf 1</i>                                                                                                                                                           | TGATCATCACTCACGACCACG     | CAGCCTCTCTGAGCCAGTTACG     |
| <i>Bdnf 2</i>                                                                                                                                                           | TGAGGATAGTGGTGGAGTTG      | TAACCTTTTCCTCCTCC          |
| <i>Bdnf 4</i>                                                                                                                                                           | GCGCGGAATTCTGATTCTGGTAAT  | GAGAGGGCTCCACGCTGCCTTGACG  |
| <i>Cdk5</i>                                                                                                                                                             | CGCAGCCTGTTGGACTTTGT      | GCGTTGCAGAGGAGGTGGTA       |
| <i>GluR1</i>                                                                                                                                                            | GGAGGAGAGCAGAGGGAGAG      | TTCCTGCAATTCCTTGCTTG       |
| <i>GluR2</i>                                                                                                                                                            | GCGGTGCTAAAATCGAATGC      | ACAGAGAGGGGCAGGCAG         |
| <i>NR2A</i>                                                                                                                                                             | TCGGCTTGGACTGATACGTG      | AGGATAGACTGCCCTGCAC        |
| <i>NR2B</i>                                                                                                                                                             | CCTTAGGAAGGGGACGCTTT      | GGCAATTAAGGGTTGGGTTT       |
| <i>Svp</i>                                                                                                                                                              | CTAGCCTCCCGAATGGAATG      | CAGCAGCAGCATCAGCAATG       |
| <i>BNDF-3UTR</i>                                                                                                                                                        | CAGTGGCTGGCTCTCTTACC      | TGCTGCCATGCATAAAACAT       |
| <i>CamKII</i>                                                                                                                                                           | GACCT GGATG CTGAC GAAG    | AGGTG ATGGT AGCCA TCCTG    |
| <i>MAP2</i>                                                                                                                                                             | CCAGTACCAACAGGGGTTGT      | CTCGGGGCTCACAAAGTAAG       |
| <i>SCN2B</i>                                                                                                                                                            | TCTGAAATCCACCAACCACA      | CCAAGGACCACAAGGTAGGA       |
| <i>SOD1</i>                                                                                                                                                             | AGGCTCCTCGGGAACCTTCT      | CGGAGCTTTTATAGGCCTGAG      |
| <i>ALSin</i>                                                                                                                                                            | TTCACTGAGTCTTCGGTTGC      | GGGTGGAGCTAGGCAAGAG        |
| <i>Setx</i>                                                                                                                                                             | TCCATTATCGGAGCCTGTTC      | TTACCTGCTGGTTCCCTTTG       |
| <i>VAPB</i>                                                                                                                                                             | GCGGGAAGAAAGTGGAAGTT      | ACGCACGTACGTAGCAGATG       |
| <i>ANG</i>                                                                                                                                                              | ACATGGCTCGTTGGTCTAGG      | TGTCAGGAAGACCCTGGAAG       |
| <i>TDP43</i>                                                                                                                                                            | AGGGACCATTTTGCAGATCA      | GTAACGCGGTAGATGGCTTC       |
| <i>FUS</i>                                                                                                                                                              | AGTGGGGTAGAGGTGTGTCCG     | GGGACGTACCAAGTGAGAA        |
| <i>SMN</i>                                                                                                                                                              | GCATCAAGAACCAGCAAACA      | CCAACCTCACTCCTCCACAT       |
| <b>Supplemental Table 2B. Primer sequences used in pre-CLIP and CLIP-qRT-PCR to Detect Retention of 5' Splice Junctions of <i>Bdnf</i> Exons. (Related to Figure 5)</b> |                           |                            |
| <b>5' Splice junction @</b>                                                                                                                                             |                           | <b>Sequence (5' to 3')</b> |
| Exon1/Intron1                                                                                                                                                           | Forward                   | GTGTCTCTCAGAATGAGGGCGTTT   |
|                                                                                                                                                                         | Reverse                   | GTGAAGTGCTAGGAAGAGCCATGA   |

|               |         |                           |
|---------------|---------|---------------------------|
| Exon2/Intron2 | Forward | TGAAGTTGGCTTCCTAGCGGTGTA  |
|               | Reverse | CCCAGGTTCTCACCTAGGTCAATTT |
| Exon3/Intron3 | Forward | TTGGAGGGCTCCTGCTTCTCAA    |
|               | Reverse | CATCTTCACTCCCTGCTAGGCTAC  |
| Exon4/Intron4 | Forward | ACAGGAGTACATATCGGCCACCAA  |
|               | Reverse | CCCGGATAGCATTACACCAAGTTAC |
| Exon5/Intron5 | Forward | GGCAGACGAGAAAGCGCA        |
|               | Reverse | CCAAATTTGCGTGGAGAGTGCCTA  |
| Exon6/Intron6 | Forward | AACTTGGGACCCTTCTTATCGCTG  |
|               | Reverse | TCCTCCTTGGATCCTCCCTCTCT   |
| CDS           | Forward | TGTCTCTGCTTCCTTCCCACAGTT  |
|               | Reverse | CCGCCTTCATGCAACCGAAGTATG  |
| Rplp0         | Forward | CCGATCTGCAGACACACT        |
|               | Reverse | ACCCTGAAGTGCTCGACATC      |

**Supplemental Table 2C.** *Bdnf* 5' Splice Junction and 3'UTR Oligoribonucleotides Used in FUS-RNA Electrophoretic Mobility Shift Assays. (Related to Figure 6)

| <b>RNA Oligo ID</b> | <b>Sequence (5' to 3')</b> |
|---------------------|----------------------------|
| Exon1/Intron1       | AAGCCACAAUGGUGAGUAGCAAUA   |
| Exon2/Intron2       | GCCGCAAAGAAGGUAAGCACCGGG   |
| Exon3/Intron3       | CUUGAGCCCAGGUCCGAGUCAGGC   |
| Exon4/Intron4       | GACUGAAAAAGGUGGGUUUCUUUU   |
| Exon5/Intron5       | UGGACCCUGAGGUAGGCGACUGCG   |
| Exon6/Intron6       | UUUCAUCCGGGAGUAGGUUGGGUGUU |
| Exon7/Intron7       | GUGUCGUAAAGGUGAGCAACAAAG   |
| 3' UTR #1           | ACAAUGUCAAGGUGCUGUUGUCAU   |
| 3' UTR #2           | CUAGGAUGGAGGUGGGGAAUGGUAC  |
| 3' UTR #3           | GACAUAGCAAGGUGCUUUCACUGU   |
| 3' UTR #4           | GCUACAUGUUGGUGGUUUAUGUUGA  |

Qiu, Lee, et al.

Full unedited gel for Figure 2A

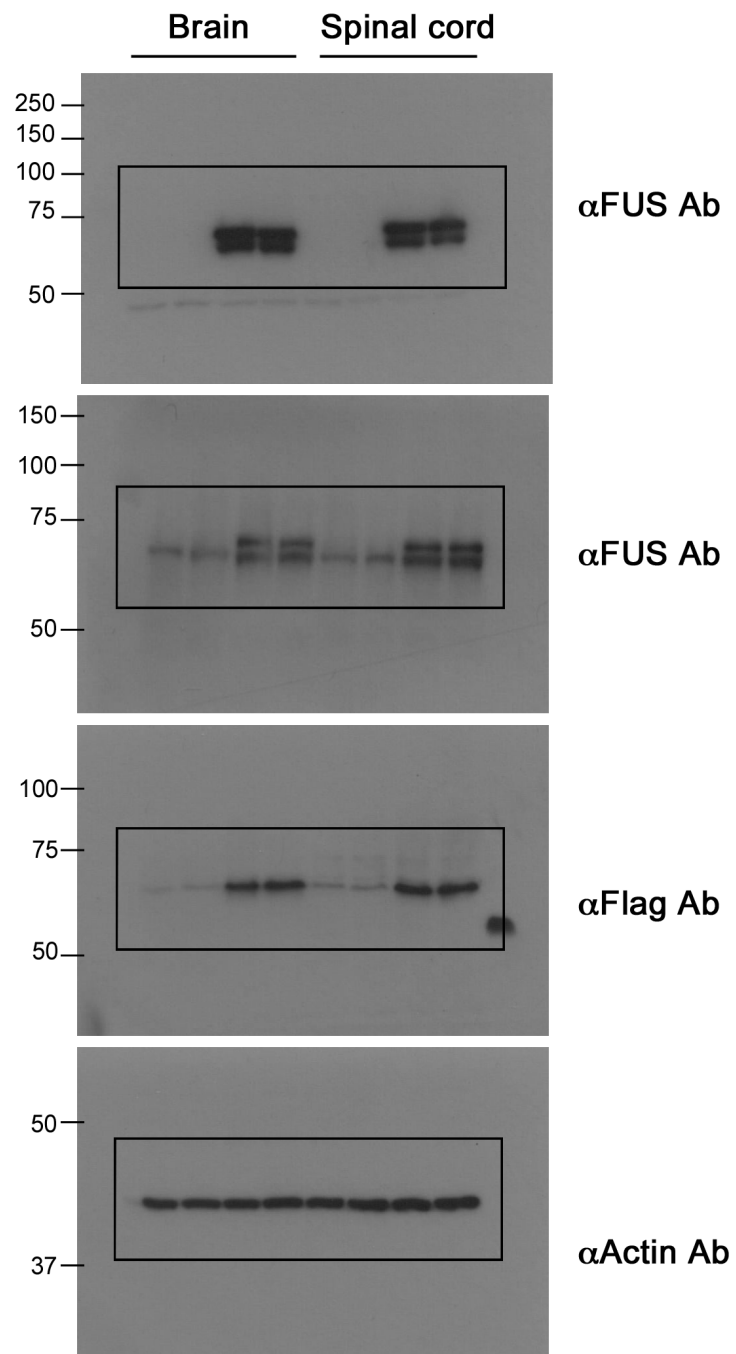



Qiu, Lee, et al.

Full unedited gel for Figure 2C, 2D

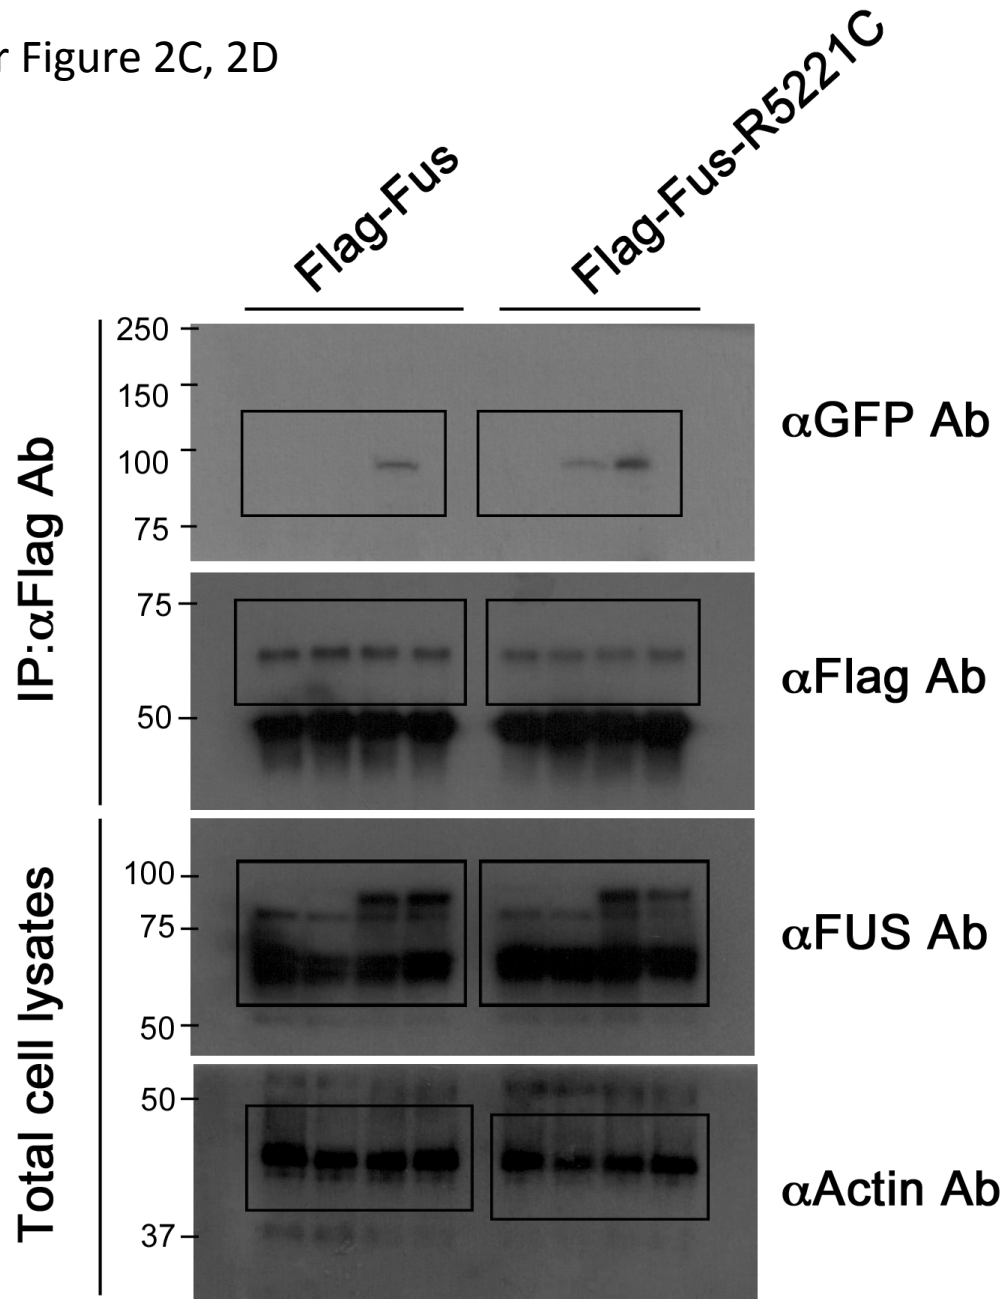

Qiu, Lee, et al.  
Full unedited gel for Figure 2E

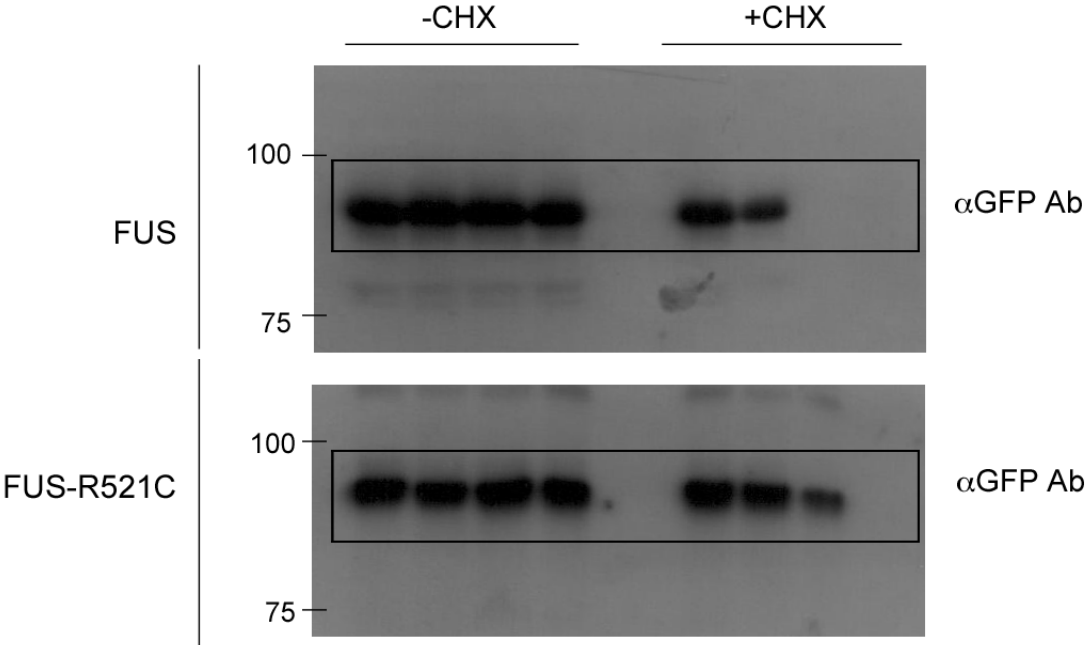

Qiu, Lee, et al.  
Full unedited gel for Figure 3A

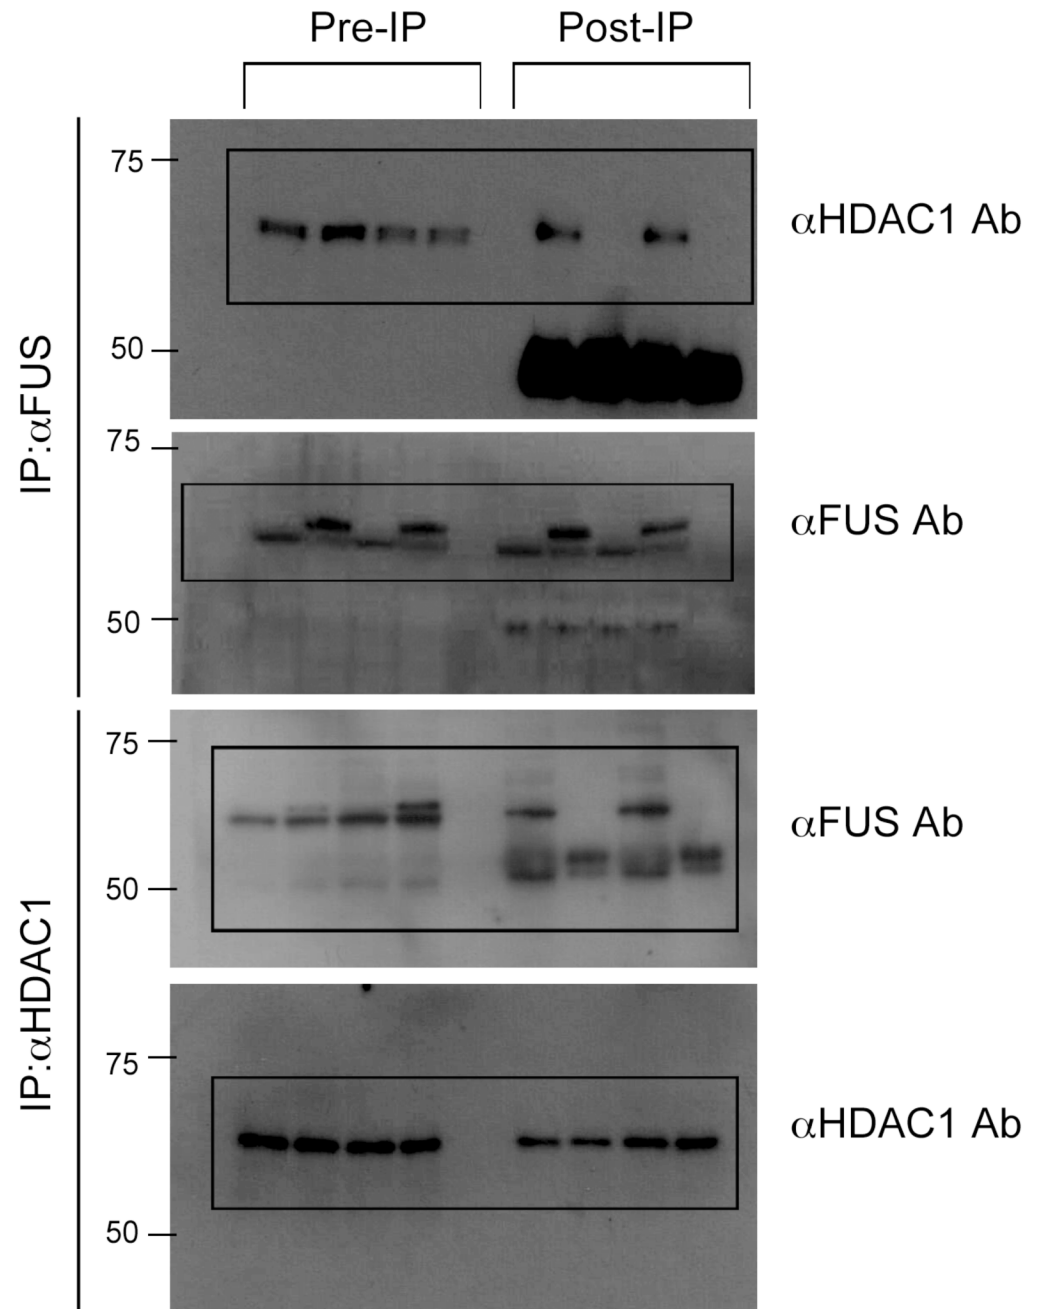

Qiu, Lee, et al.  
Full unedited gel for Figure 3B

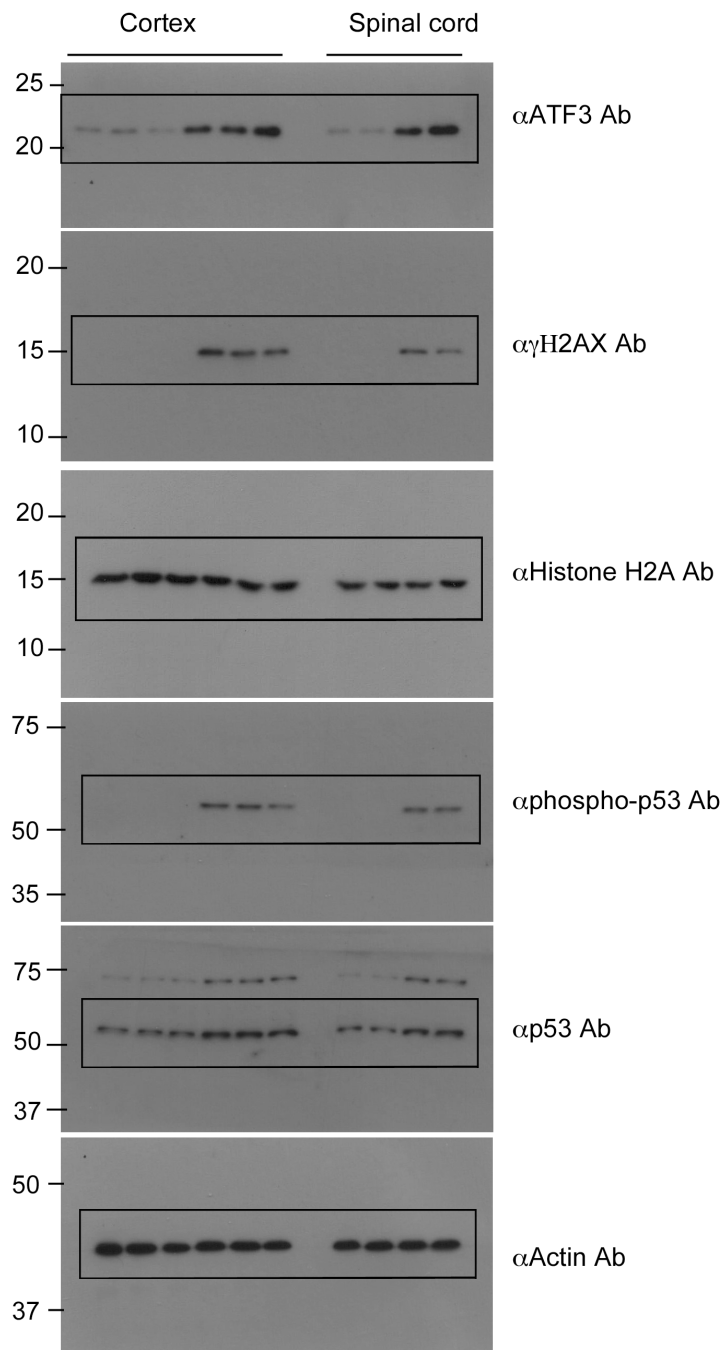

Qiu, Lee, et al.

Full unedited gel for Figure 7A

|               | Exon1/Intron1 |   | Exon2/Intron2 |   | Exon3/Intron3 |   | Exon4/Intron4 |   | Exon5/Intron5 |   | Exon6/Intron6 |   | Exon7/Intron7 |   | 3' UTR #2 |
|---------------|---------------|---|---------------|---|---------------|---|---------------|---|---------------|---|---------------|---|---------------|---|-----------|
| GST-FUS-WT    | +             | - | +             | - | +             | - | +             | - | +             | - | +             | - | +             | - | +         |
| GST-FUS-R521C | -             | + | -             | + | -             | + | -             | + | -             | + | -             | + | -             | + | -         |

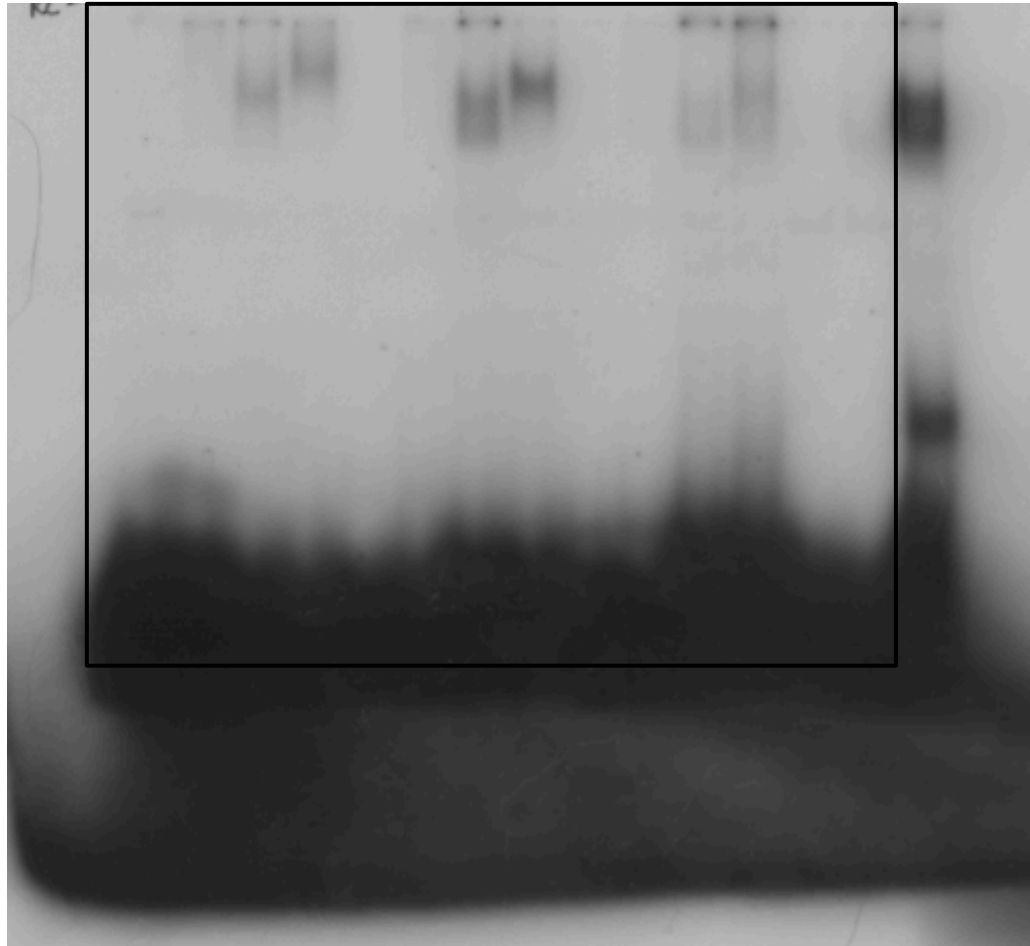

Qiu, Lee, et al.  
Full unedited gel for Figure 7B

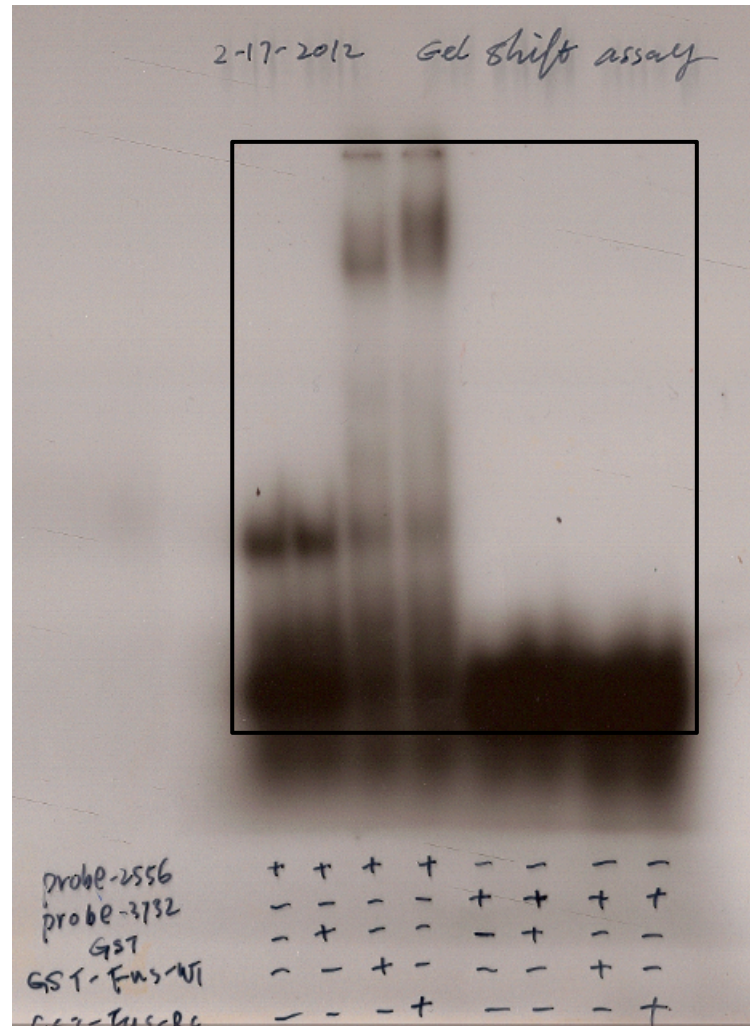

Qiu, Lee, et al.  
Full unedited gel for Figure 7C

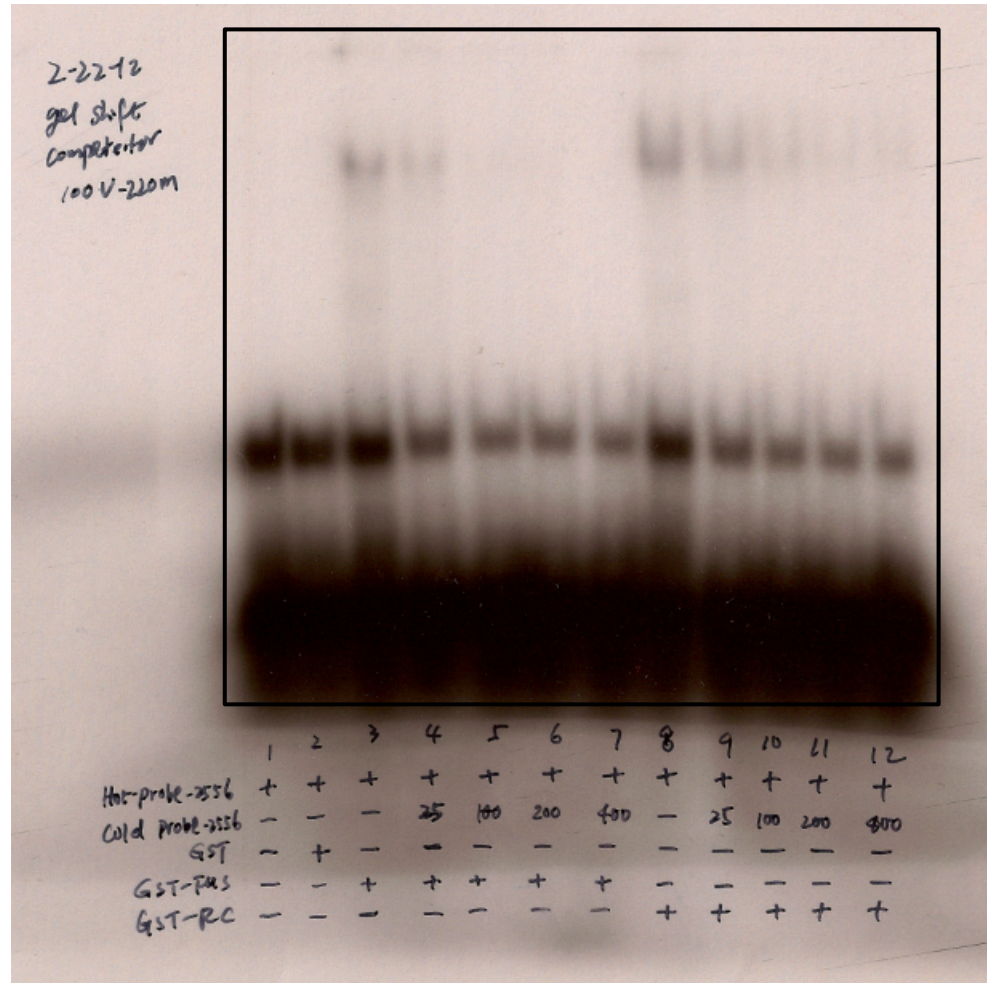

Qiu, Lee, et al.

Full unedited gel for Figure 8B

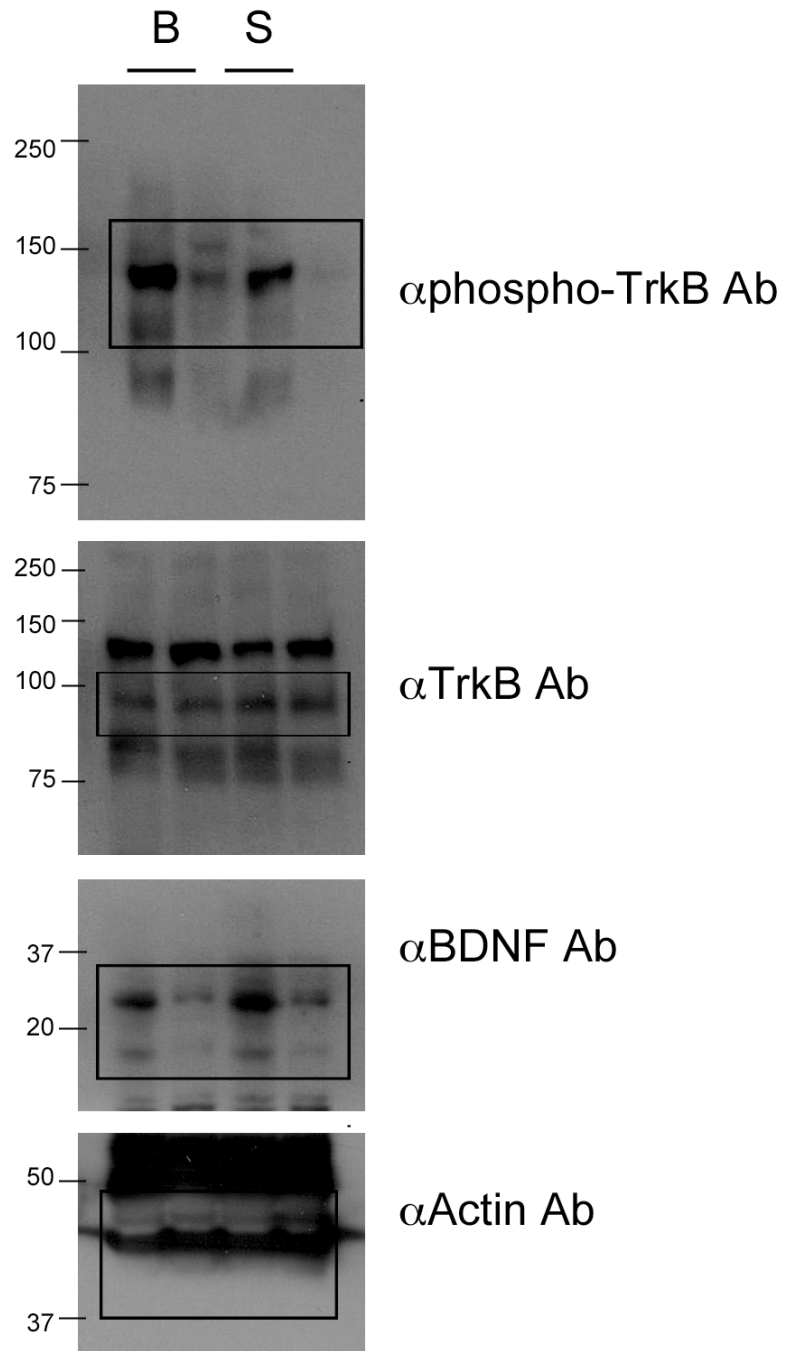



Qiu, Lee, et al.  
Full unedited gel for Figure 8E

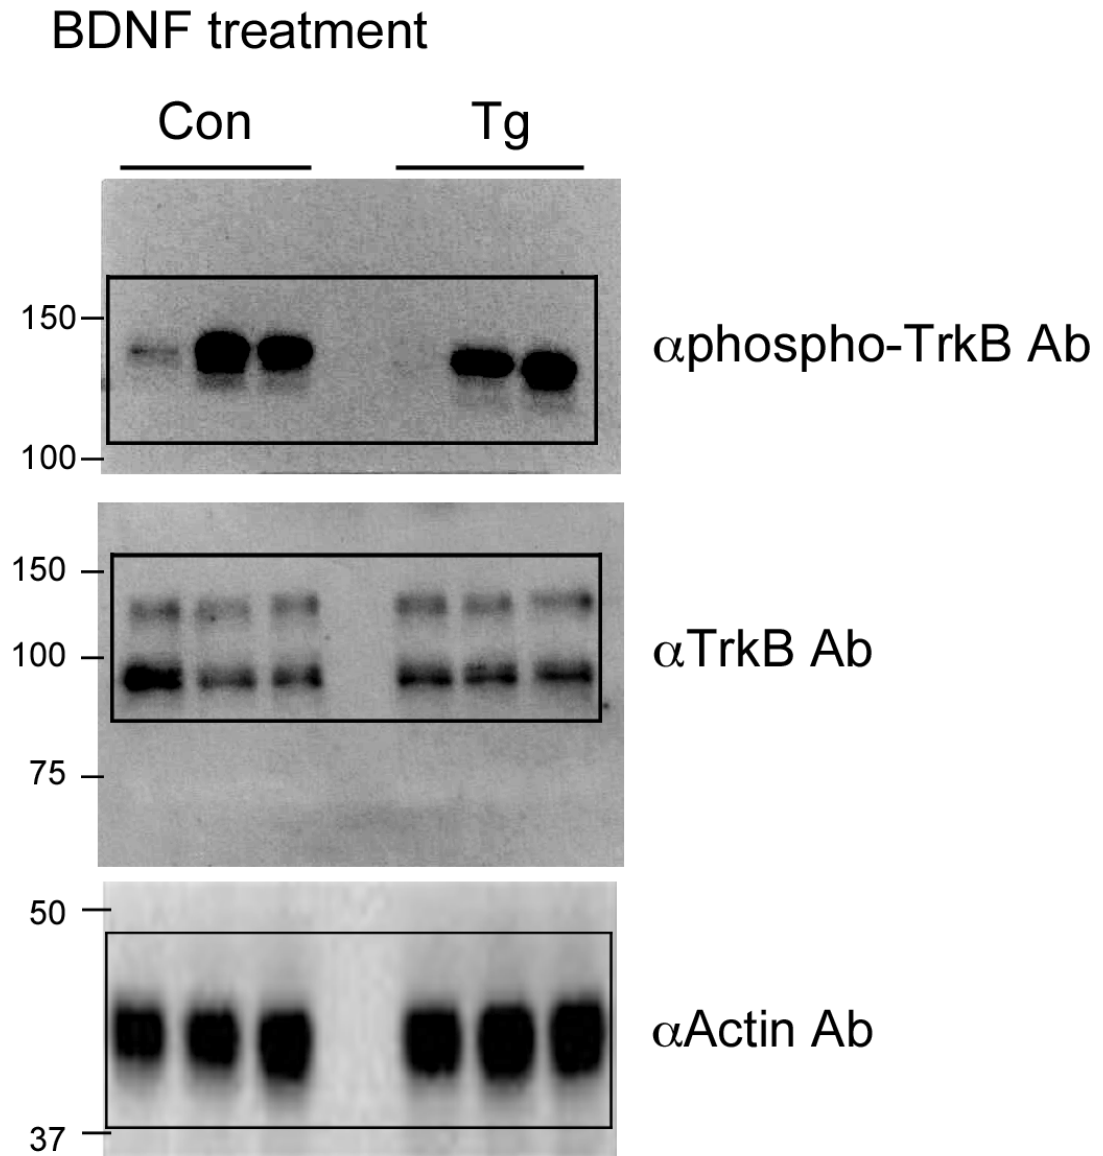

Qiu, Lee, et al.  
Full unedited gel for Supplemental Figure 6

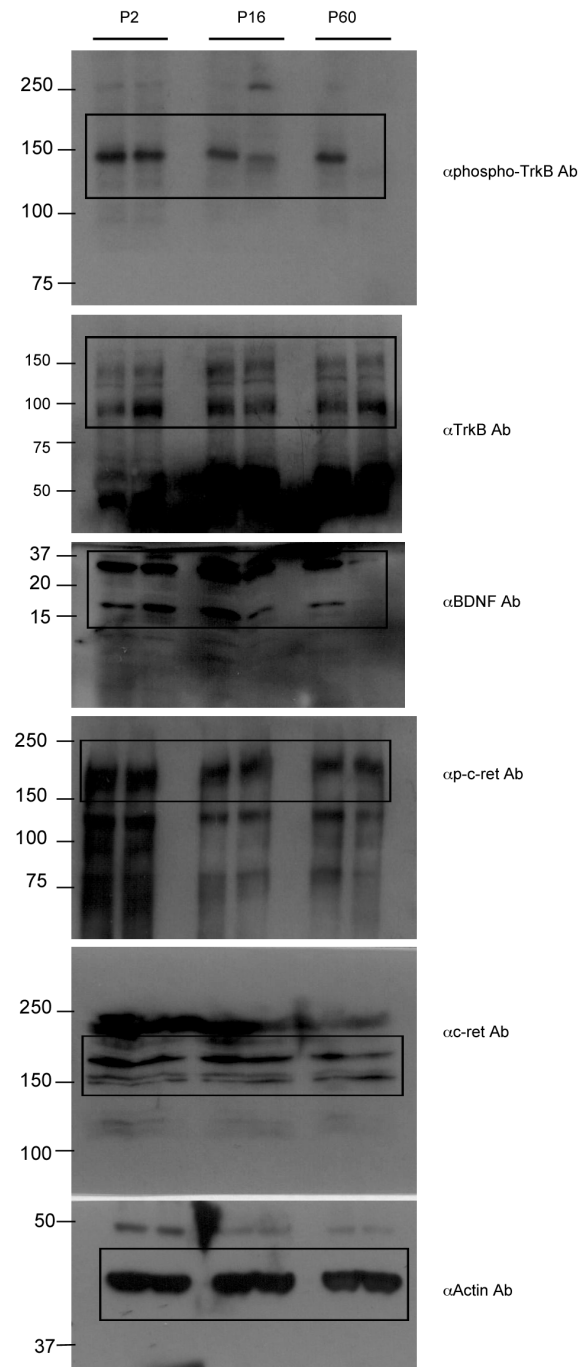

Qiu, Lee, et al.  
Full unedited gel for Supplemental Figure 10

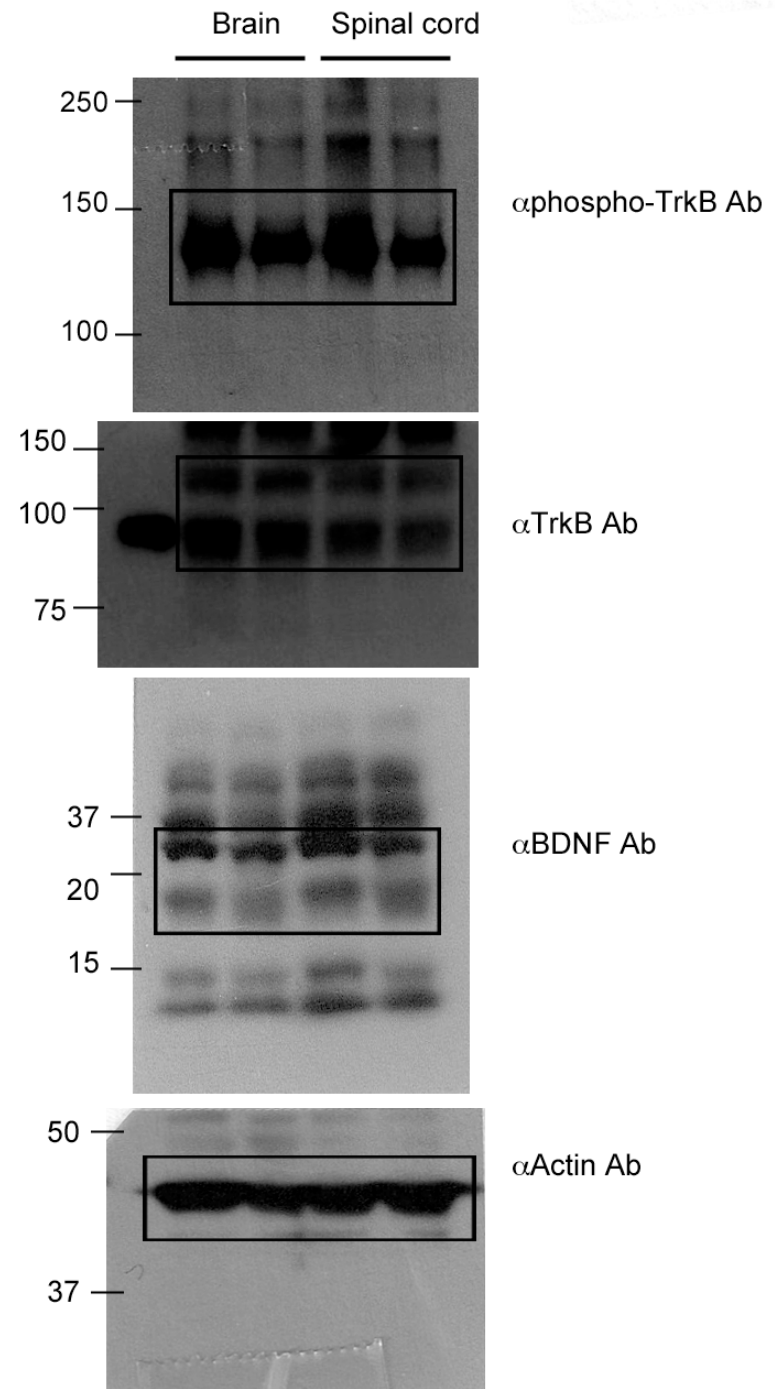

Supplement: JCI72723sd.pdf [file JCI72723sd.pdf]
